# Supplementary material for: Near-infrared light-induced photoisomerization and photodissociation of a chiral fluorescent photoswitch in cholesteric liquid crystals assisted by upconversion nanoparticles
Source: Royal Society of Chemistry journal article supplement (doi:10.1039/d0sm02109a), 2020-12-09
Supplement: d0sm02109a1.pdf [file d0sm02109a1.pdf]

## Supporting Information

# **Near-infrared light-induced photoisomerization and photodissociation of chiral fluorescent photoswitch in cholesteric liquid crystals assisted by upconversion nanoparticles**

Ao Juan<sup>†</sup>, Siyang Lin<sup>†</sup>, Yanrong He, Qingyan Fan, Jinbao Guo<sup>\*</sup>

Key Laboratory of Carbon Fibers and Functional Polymers, Ministry of Education, Beijing Engineering Research Center for the Synthesis and Applications of Waterborne Polymers and College of Materials Science and Engineering, Beijing University of Chemical Technology, Beijing, 100029, China. E-mail: guojb@mail.buct.edu.cn

<sup>†</sup> These two authors contribute equally to this work.

## 1. General information

All the materials, solvents and reagents were obtained from commercial sources and used as purchased. Column chromatography was carried out on silica gel (200–300 mesh).  $^1\text{H}$ -NMR and  $^{13}\text{C}$ -NMR spectra were recorded on a Bruker AVANCE III (400 MHz  $^1\text{H}$ ; 100 MHz  $^{13}\text{C}$ ) spectrometer. High-resolution mass spectra (HR-MS) were obtained with XEVO-G2QTOF (ESI) (Waters, USA) in positive ion mode.

## 2. Characterizations of UCNPs

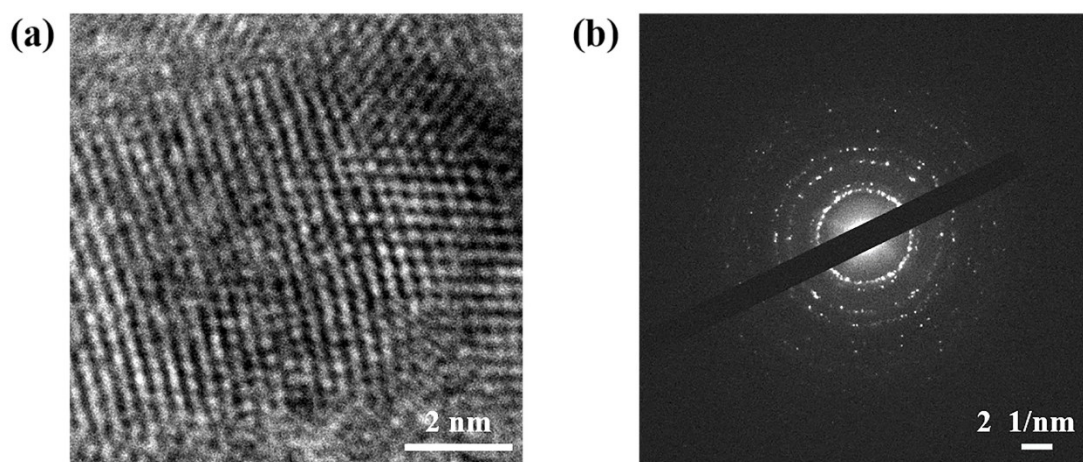

Figure S1. High-resolution transmission electron microscopy (HRTEM) image and selected area electron diffraction (SAED) of UCNPs.

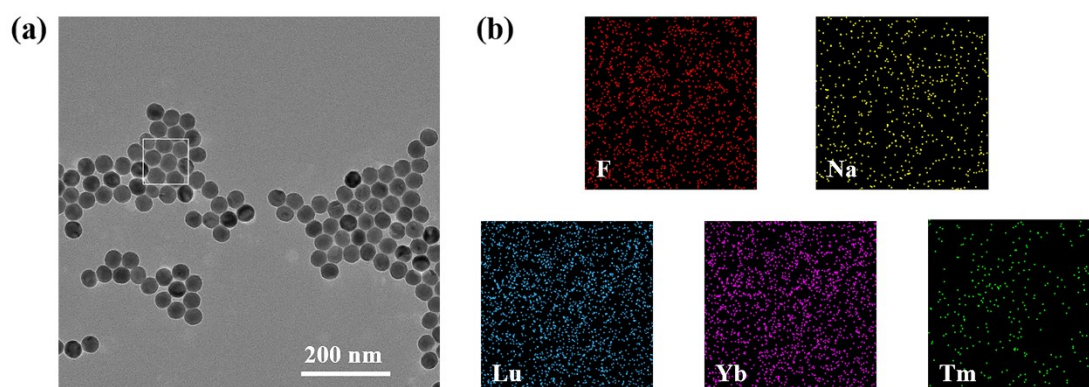

Figure S2. Element mapping of UCNPs.

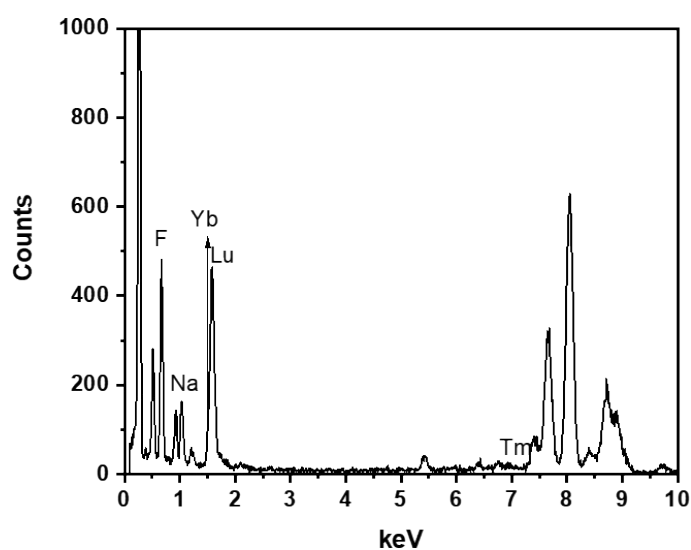

Figure S3. Energy dispersive spectrum (EDS) of UCNPs.

Table S1. Element quantitative analysis of UCNPs

| Element | (keV) | Atom% |
|---------|-------|-------|
| F       | 0.677 | 58.86 |
| Na      | 1.041 | 15.79 |
| Lu      | 1.581 | 19.45 |
| Yb      | 1.521 | 3.82  |
| Tm      | 7.179 | 2.08  |

### 3. Synthesis of switch 5

The switch **5** were synthesized according to the procedure in our previous report.<sup>1</sup>

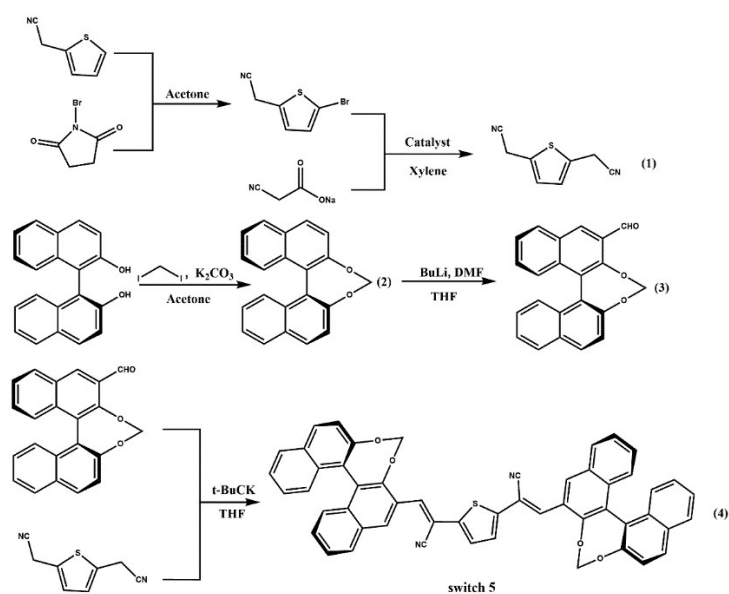

Figure S4. Synthetic procedure of switch **5**.

Characterization data for switch **5**:

$^1\text{H}$ -NMR (400 MHz, Chloroform- $d$ )  $\delta$  8.92 (s, 2H; Ar H), 8.10 -7.92 (m, 8H; Ar H), 7.55-7.42 (m, 12H; Ar H), 7.41-7.29 (m, 4H; Ar H), 5.76 (d,  $J$  = 3.4 Hz, 2H;  $\text{CH}_2$ ), 5.67 (d,  $J$  = 3.4 Hz, 2H;  $\text{CH}_2$ ).

$^{13}\text{C}$ -NMR (100 MHz, Chloroform- $d$ )  $\delta$  151.18, 148.75, 140.21, 134.37, 133.16, 132.05, 131.82, 131.10, 130.80, 129.56, 129.36, 128.51, 128.31, 127.87, 126.85, 126.62, 126.35, 126.03, 125.53, 125.45, 125.24, 120.68, 116.34, 107.20, 103.10, 58.50.

HR-MS (ESI)  $m/z$ :  $[\text{M}+\text{Na}]^+$  calculated for  $[\text{C}_{52}\text{H}_{30}\text{N}_2\text{O}_4\text{SNa}]^+$ , 801.1798; found, 801.1808.

#### 4. Characterizations of switch **5**

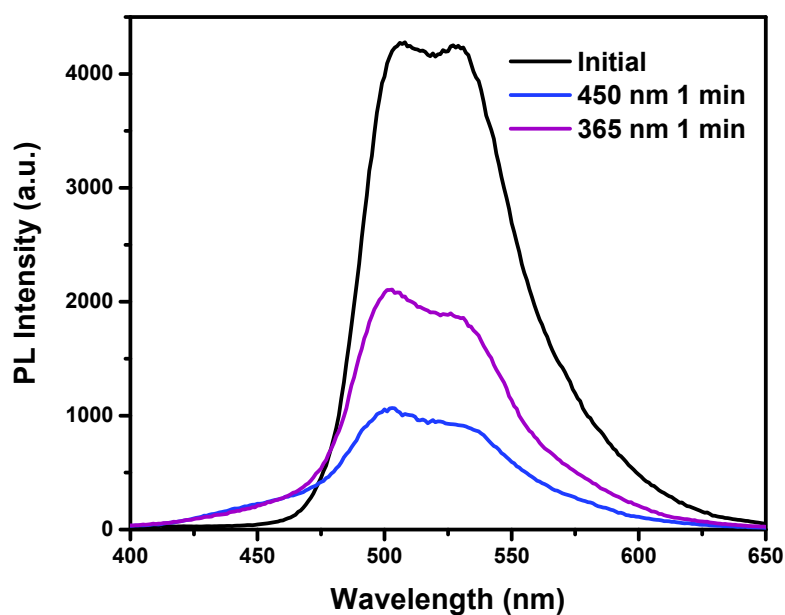

Figure S5. Fluorescence spectra of switch **5** in dichloromethane upon irradiation with 450 nm blue light and 365 nm UV light.

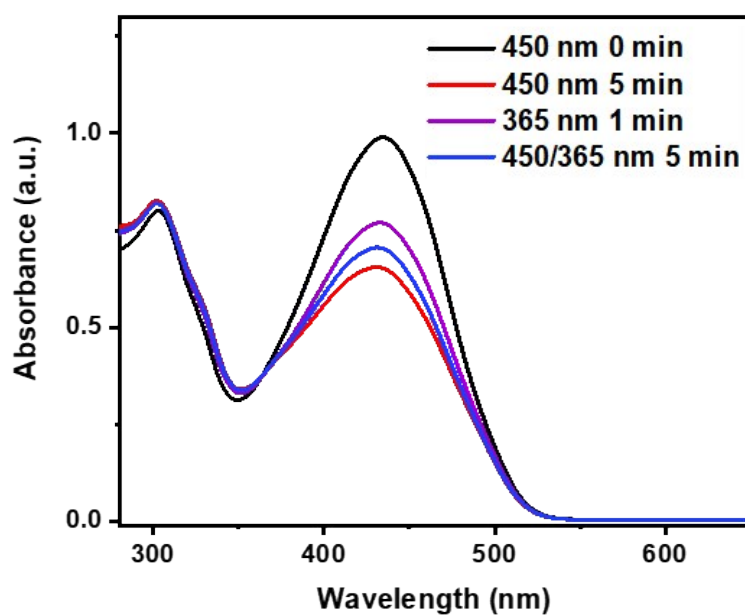

Figure S6. Absorption spectra of switch **5** in dichloromethane upon irradiation with the same intensity of 450 nm blue light and 365 nm UV light.

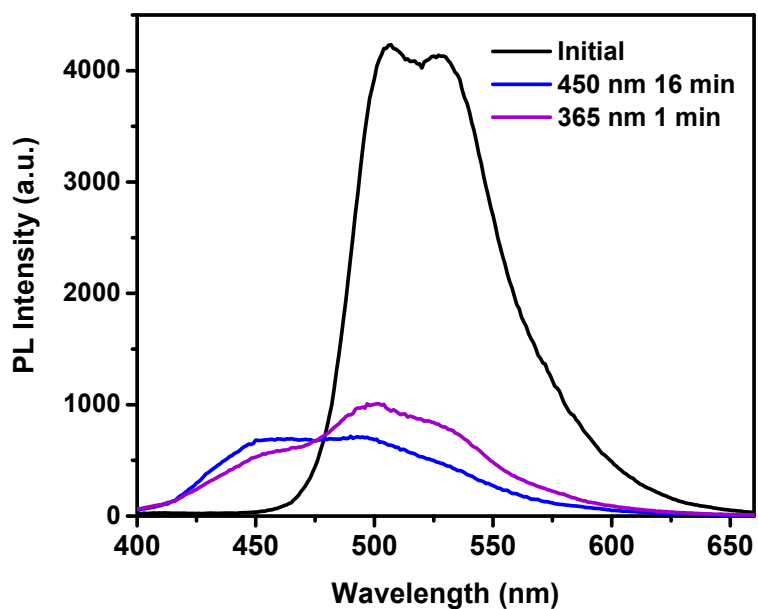

Figure S7. Fluorescence spectra of switch **5** in dichloromethane in different conditions: irradiation with 450 nm blue light for 16 min and then with 365 nm UV light for 1 min.

## 5. Chirality changes of switch **5**/UCNPs in DCM

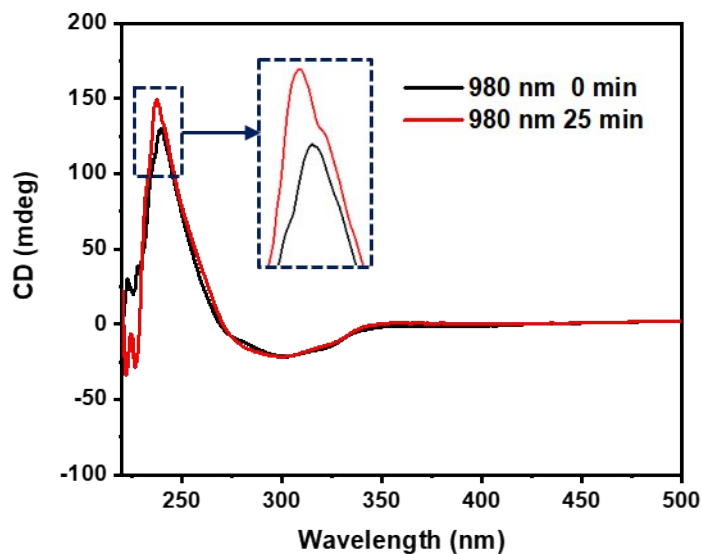

Figure S8. Circular dichroism (CD) spectra of switch **5**/UCNPs in DCM upon irradiation with 980 nm NIR light.

## 6. Phototuning of fluorescent single-mode CLC cell with 1.0 wt% switch **5** and UCNPs

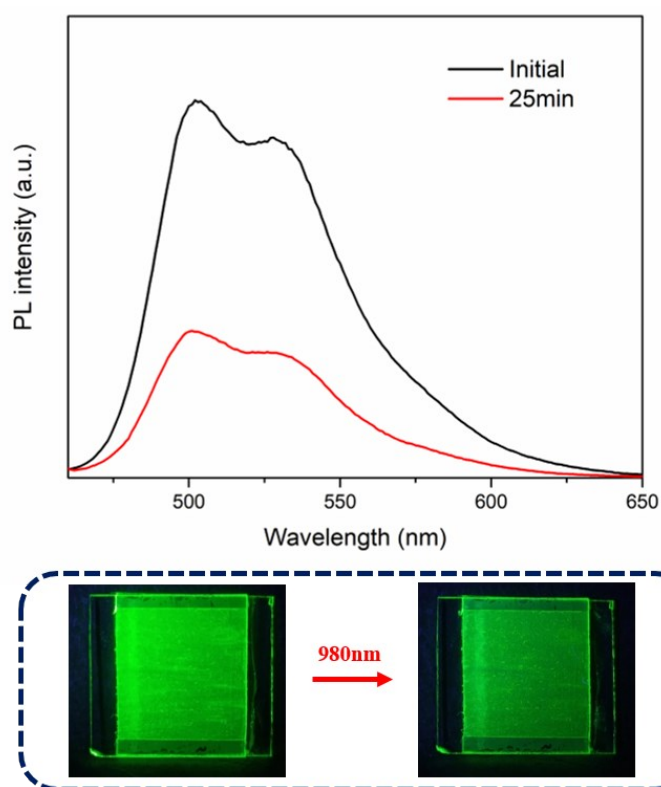

Figure S9. Fluorescence spectra and images of 1.0 wt% switch **5**/UCNPs co-doping

CLC cell.

## 7. $^1\text{H}$ -NMR and $^{13}\text{C}$ -NMR spectra of switch **5**

$^1\text{H}$ -NMR spectrum of switch **5**

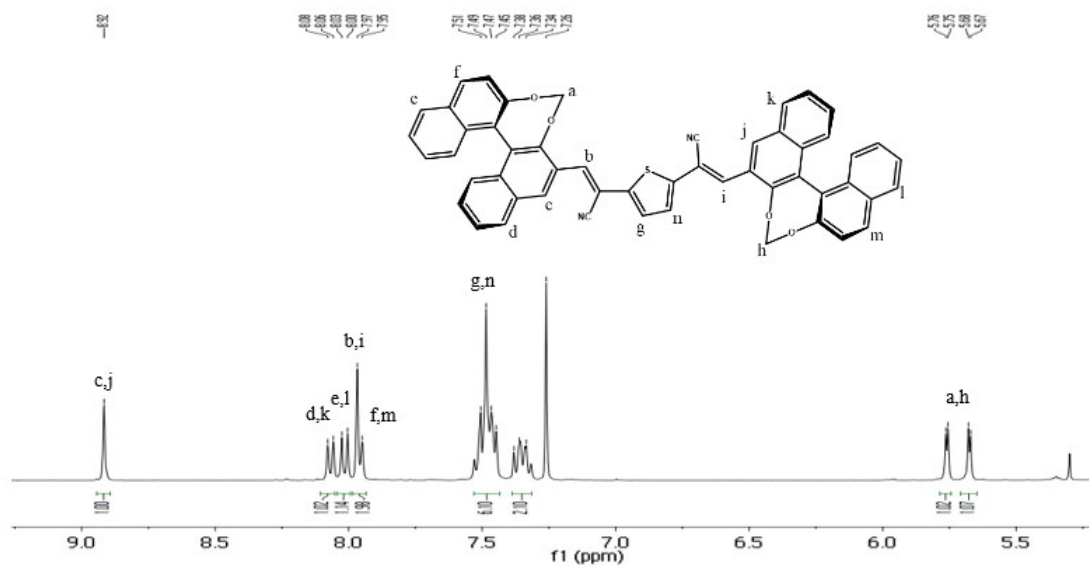

$^{13}\text{C}$ -NMR spectrum of switch **5**

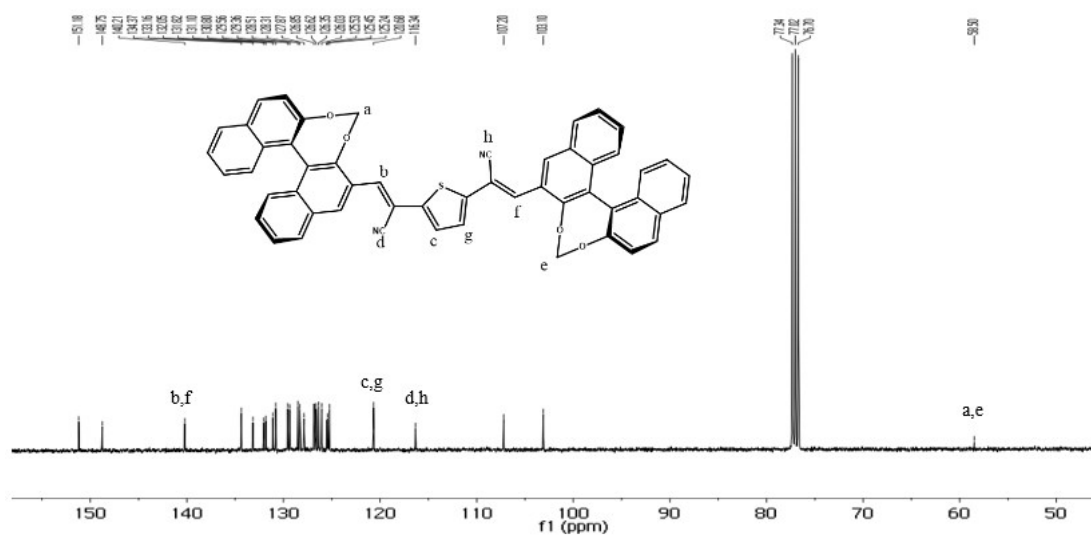

## References:

- [1] S. Lin, J. Li, H. K. Bisoyi, A. Juan, J. Guo and Q. Li, *ChemPhotoChem*, 2019, **3**, 480-486.
